# Supplementary material
Source: PubMed Central journal article supplement (PMC11027838)
Supplement: 262_2019_2449_MOESM1_ESM.pdf [file 262_2019_2449_MOESM1_ESM.pdf]

## Figure S1: Gating strategy

### A: CD4+ and CD8+ T cells; naïve, center memory, effector memory, EMRA

Lymphocytes were identified by using forward and side scatter. T lymphocytes were defined by positivity for CD8 or CD4 and subdivided into naïve (CD62L+ CD45RA+), memory T cells (CD4+ CD45RA- CD45RO+ /CD8+ CD45RA- CD45RO+) which were further divided into central memory (CD62L+ CD45RA-), effector memory (CD62L- CD45RA-) and effector memory RA+ (EMRA) (CD62L- CD45RA+).

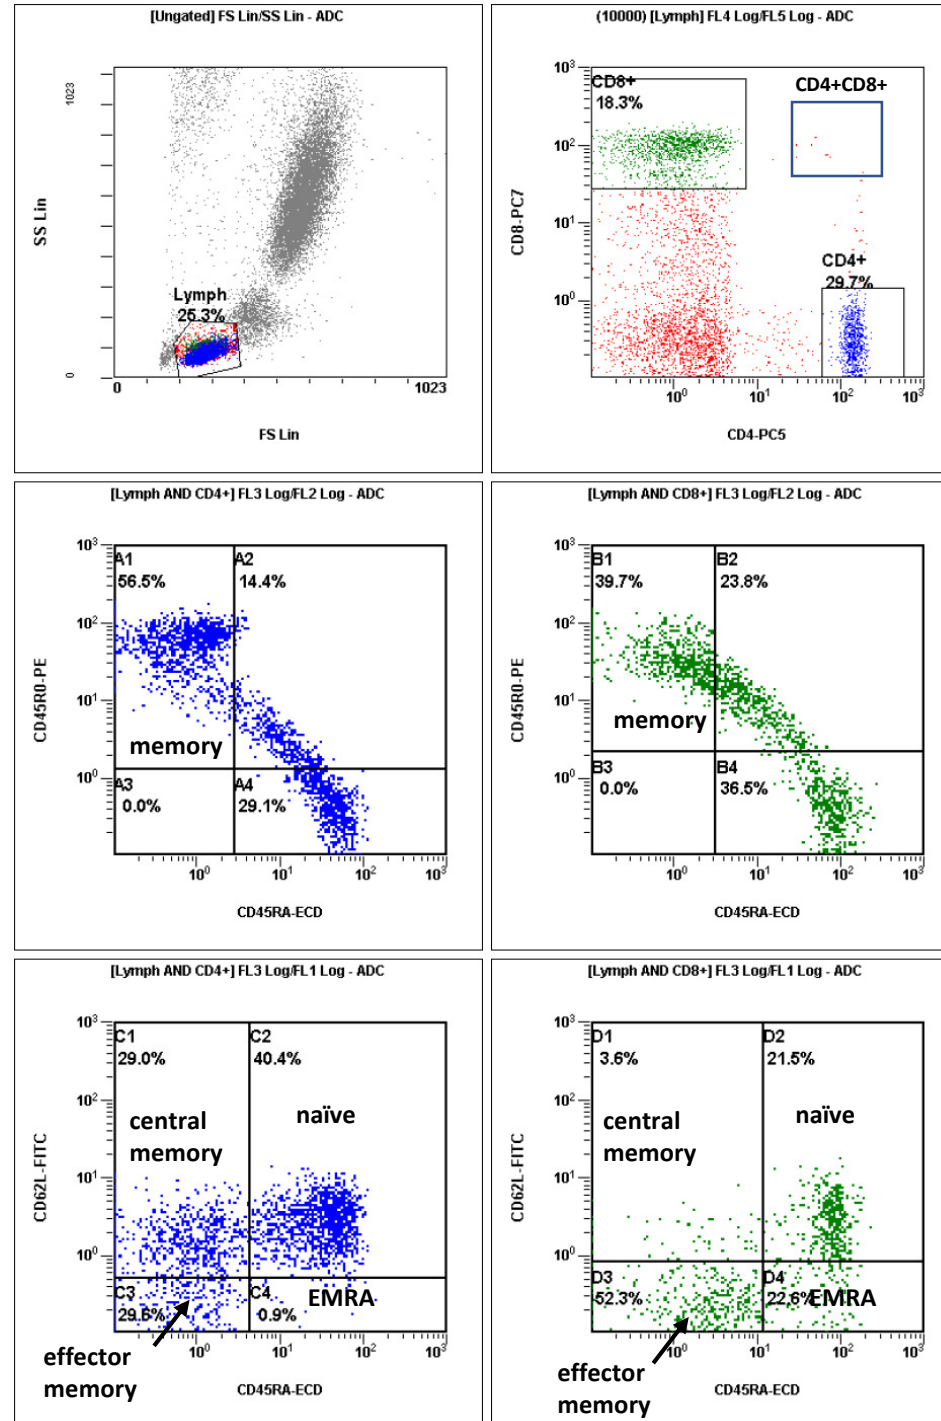

**B: CD8+ T cells; early, intermediate, late, exhausted, terminal effector**

Within CD8+ T lymphocytes, activated subsets in early (CD28+ CD27+), intermediate (CD28- CD27+) and late (CD28- CD27-) status were identified as well as exhausted (CD279+) and terminal effector (CD279- CD57+) cells.

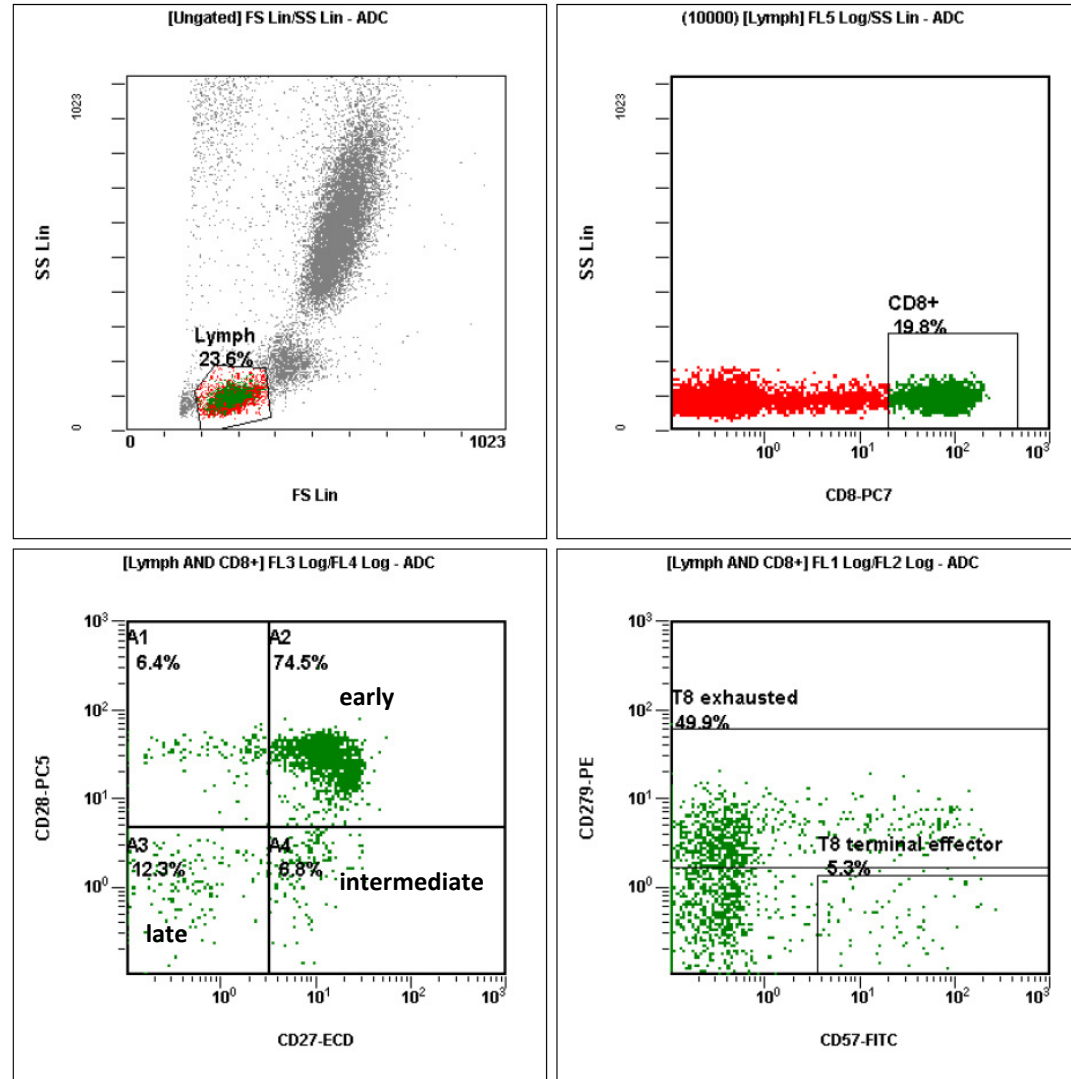

### C: Activated memory CD4+ and CD8+ T cells

CD4 and CD8 positive T lymphocytes were classified as activated memory (HLA-DR+ or CD69+) cells.

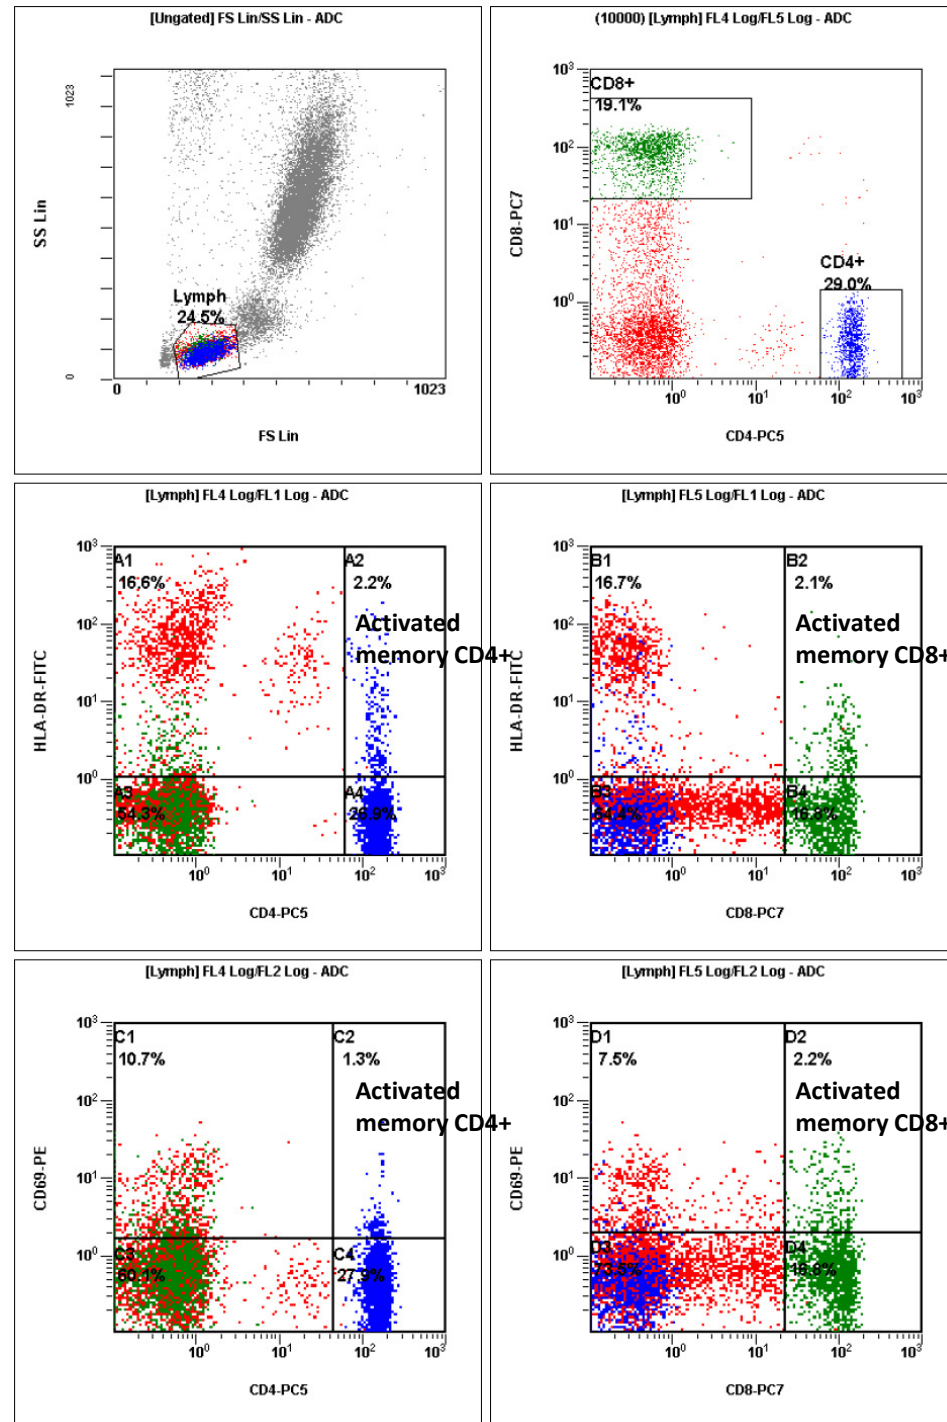

## D: NK T cells and NK cells

NK-like T cells were defined as CD56+ CD3+.

NK cells were detected as CD56+ cells and subdivided in three NK subsets (CD56+ CD16+, CD56dim CD16bright, CD56bright CD16dim).

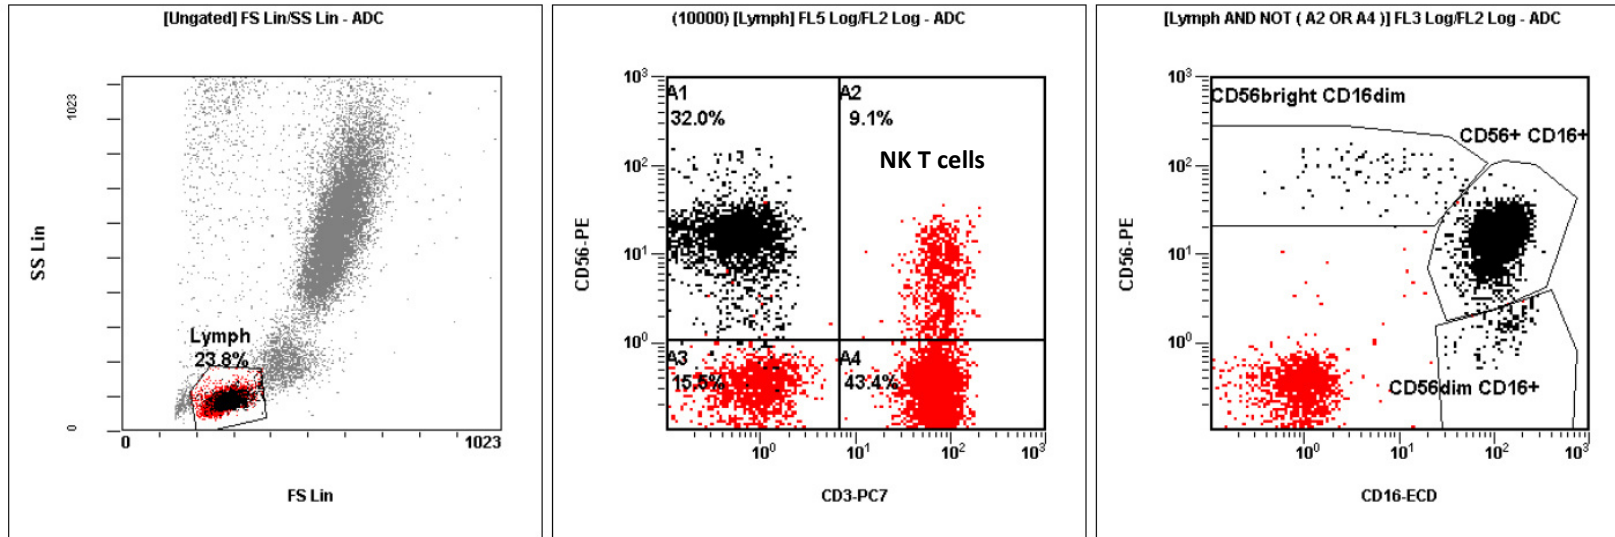

## E: T helper cells

Th1 cells were defined as CD4+ CXCR3+ CCR4- CCR5+ CCR6-;  
Th2 cells were defined as CD4+ CXCR3- CCR4+ CCR5- CCR6-;  
Th17 cells were defined as CD4+ CXCR3- CCR4+ CCR5- CCR6+.

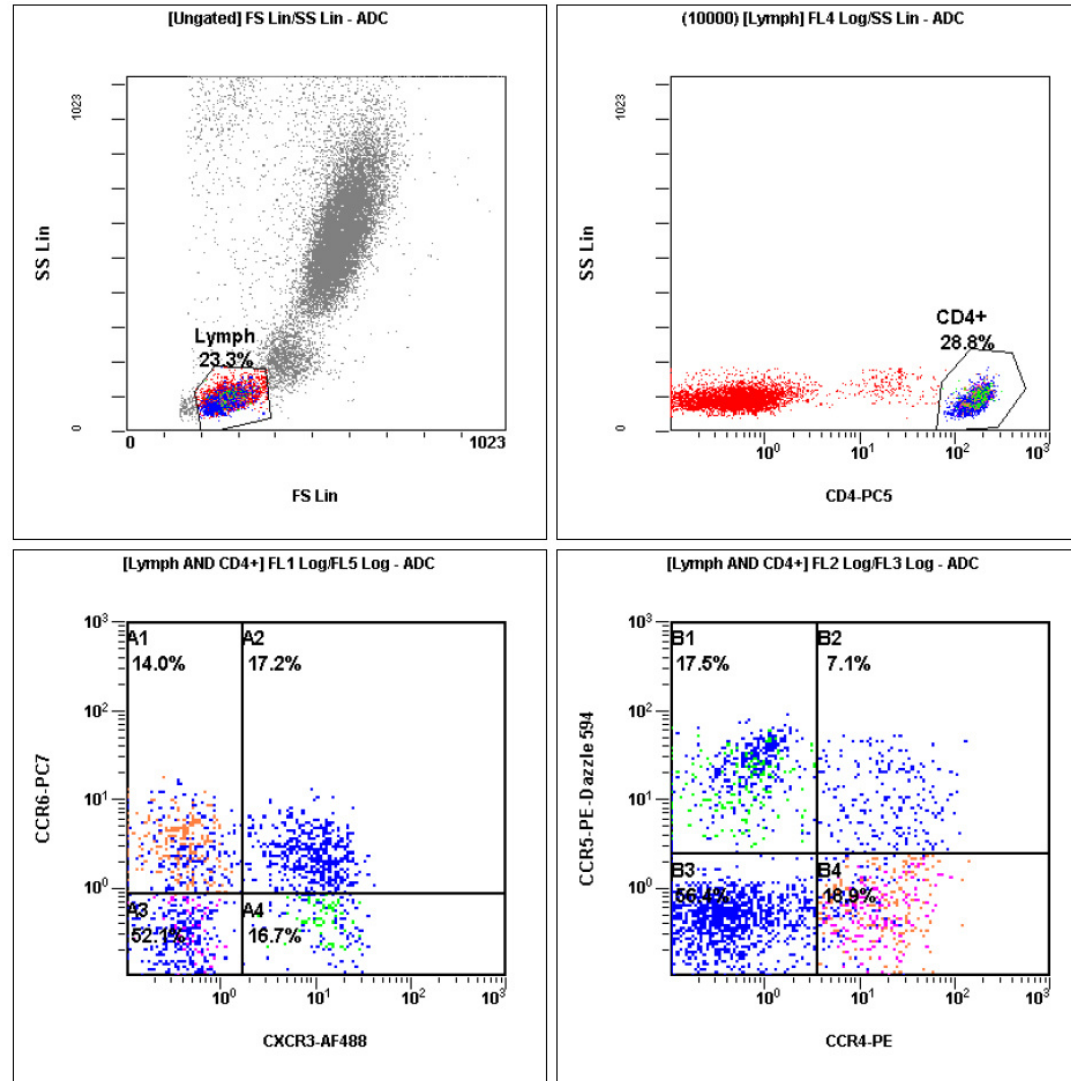

## F: Regulatory CD4 and CD8 T cells

CD4 and CD8 positive T lymphocytes were classified as regulatory (FoxP3+ or CD25+ cells).

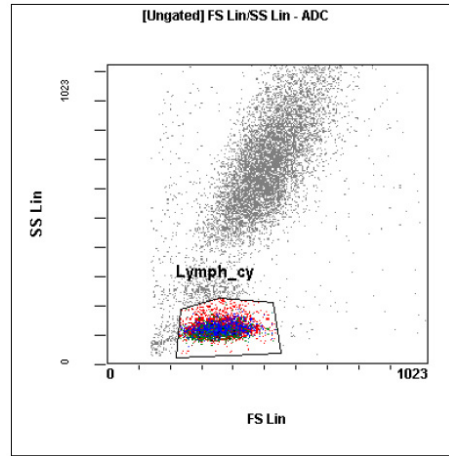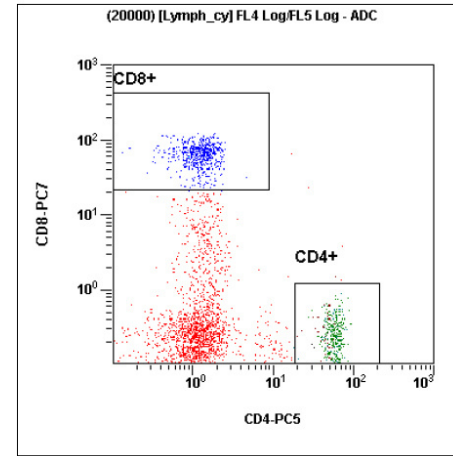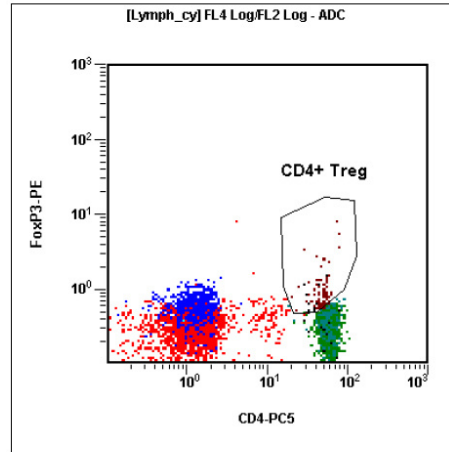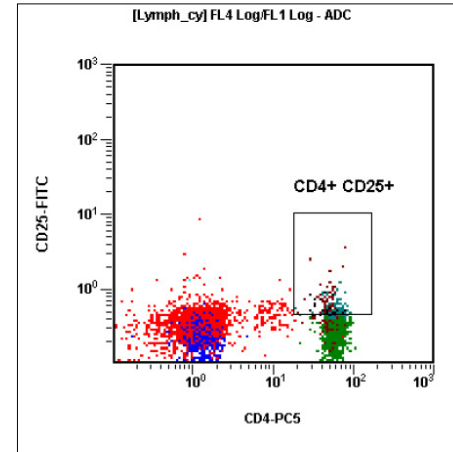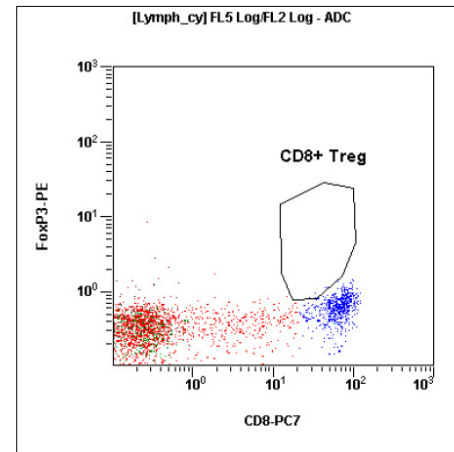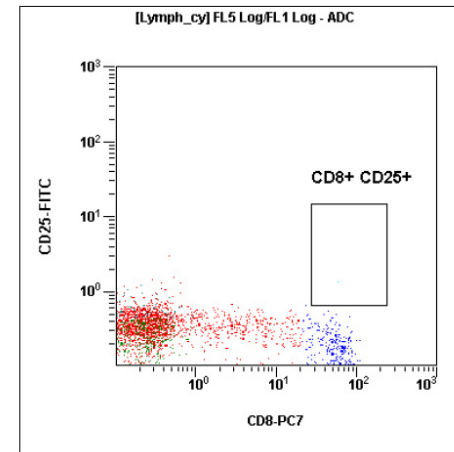

**Table S1: Fluorochrome-antibody conjugates**

| Cell population                          | Antigen       | Fluorochrome  | Clone        | Isotype    | Beckman Coulter/Biolegend item number |
|------------------------------------------|---------------|---------------|--------------|------------|---------------------------------------|
| B                                        | IgD           | FITC          | IA6-2        | IgG2a      | B30652                                |
| B                                        | CD24          | PE            | ALB9         | IgG1       | IM1428U                               |
| B, exhausted T                           | CD27          | ECD           | 1A4CD27      | IgG1       | B26603                                |
| B                                        | CD38          | PC5           | LS198-4-3    | IgG1       | A07780                                |
| B                                        | CD19          | PC7           | J3-119       | IgG1 kappa | IM3628                                |
| Memory T                                 | CD62L         | FITC          | DREG56       | IgG1       | IM1231U                               |
| Memory T                                 | CD45 R0       | PE            | UCHL1        | IgG2a      | A07787                                |
| Memory T, Treg                           | CD45RA        | ECD           | 2H4LDH11LDB9 | IgG1       | IM2711U                               |
| Memory T, activated T, Treg, Th subsets  | CD4           | PC5           | 13B8.2       | IgG1       | A07752                                |
| Memory T, Treg, exhausted T, activated T | CD8           | PC7           | SFCI21Thy2D3 | IgG1       | 737661                                |
| Exhausted CD8-T                          | CD57          | FITC          | NC1          | IgM        | B49188                                |
| Exhausted CD8-T                          | CD279         | PE            | PD1.3        | IgG2b      | B30634                                |
| Exhausted CD8-T                          | CD28          | PC5           | CD28.2       | IgG1       | 6607108                               |
| Activated T                              | HLA-DR        | FITC          | Immu-357     | IgG1       | IM1638U                               |
| Activated T                              | CD69          | PE            | TP1.55.3     | IgG2b      | IM1943U                               |
| Treg                                     | CD25          | FITC          | B1.49.9      | IgG2a      | IM0478U                               |
| Treg                                     | FoxP3         | PE            | Ab259D       | IgG1 kappa | B46031                                |
| T/NK                                     | CD56          | PE            | N901/NK-1    | IgG1       | A07788                                |
| T/NK                                     | CD16          | ECD           | 3G8          | IgG1       | A33098                                |
| T/NK                                     | CD19          | PC5           | J3-119       | IgG1       | A07771                                |
| T/NK                                     | CD3           | PC7           | UCHT1        | IgG1       | 737657                                |
| Th subsets                               | CD183 (CXCR3) | AF488         | G025H7       | IgG1       | B68144                                |
|                                          | CD194 (CCR4)  | PE            | L291H4       | IgG1       | 359412                                |
|                                          | CD195 (CCR5)  | PE/Dazzle 594 | J418F1       | IgG2b      | 359126                                |
|                                          | CD196 (CCR6)  | PC7           | B-R35        | IgG2a      | B68132                                |

*FITC* fluorescein isothiocyanate, *PE* phycoerythrin, *ECD* phycoerythrin-Texas red, *PC-5* phycoerythrin cyanin, *PC7* phycoerythrin cyanin7, *AF488* Alexa-Fluor 488

Table S2 Lymphocyte subsets and p values vor subgroups

**A) Men vs. Women**

|                           | Men (n=14)           |                      |         | Women (n=12)         |                      |              |
|---------------------------|----------------------|----------------------|---------|----------------------|----------------------|--------------|
|                           | Before chemotherapy  | After chemotherapy   | P value | Before chemotherapy  | After chemotherapy   | P value      |
| <b>B Lymphocytes</b>      |                      |                      |         |                      |                      |              |
| B Lymphocytes             | 0.059 [0.024; 0.148] | 0.046 [0.025; 0.066] | 0.039   | 0.105 [0.071; 0.184] | 0.060 [0.023; 0.134] | <b>0.017</b> |
| naive                     | 0.031 [0.010; 0.083] | 0.021 [0.011; 0.041] | 0.064   | 0.067 [0.044; 0.136] | 0.044 [0.014; 0.094] | <b>0.007</b> |
| memory                    | 0.003 [0.001; 0.005] | 0.002 [0.001; 0.005] | 0.087   | 0.006 [0.003; 0.013] | 0.003 [0.001; 0.004] | <b>0.005</b> |
| class switched            | 0.010 [0.003; 0.021] | 0.004 [0.002; 0.012] | 0.101   | 0.012 [0.006; 0.022] | 0.007 [0.004; 0.015] | 0.059        |
| transitory                | 0.001 [0.000; 0.004] | 0.000 [0.000; 0.003] | 0.814   | 0.003 [0.001; 0.005] | 0.001 [0.000; 0.002] | 0.139        |
| <b>CD8+ T Lymphocytes</b> |                      |                      |         |                      |                      |              |
| CD8+ Lymphocytes          | 0.198 [0.089; 0.311] | 0.206 [0.099; 0.265] | 0.638   | 0.247 [0.134; 0.483] | 0.300 [0.156; 0.449] | 0.937        |
| CD4+CD8+                  | 0.005 [0.001; 0.010] | 0.003 [0.001; 0.010] | 0.807   | 0.006 [0.002; 0.016] | 0.004 [0.003; 0.013] | 0.272        |
| memory                    | 0.054 [0.039; 0.110] | 0.063 [0.033; 0.128] | 0.510   | 0.096 [0.039; 0.145] | 0.105 [0.071; 0.150] | 0.583        |
| central memory            | 0.025 [0.015; 0.067] | 0.024 [0.016; 0.036] | 0.433   | 0.031 [0.013; 0.058] | 0.030 [0.017; 0.053] | 0.308        |
| naive                     | 0.039 [0.012; 0.091] | 0.034 [0.014; 0.048] | 0.084   | 0.044 [0.021; 0.102] | 0.042 [0.022; 0.139] | 0.583        |
| effector memory           | 0.048 [0.035; 0.068] | 0.051 [0.026; 0.102] | 0.551   | 0.103 [0.037; 0.136] | 0.080 [0.058; 0.121] | 0.937        |
| EMRA                      | 0.036 [0.022; 0.106] | 0.056 [0.028; 0.097] | 0.975   | 0.065 [0.029; 0.192] | 0.087 [0.035; 0.157] | 0.754        |
| early                     | 0.074 [0.035; 0.168] | 0.068 [0.045; 0.122] | 0.730   | 0.112 [0.057; 0.271] | 0.121 [0.068; 0.241] | 0.272        |
| intermediate              | 0.001 [0.005; 0.012] | 0.014 [0.006; 0.015] | 0.245   | 0.017 [0.008; 0.028] | 0.031 [0.009; 0.045] | 0.158        |
| late                      | 0.043 [0.020; 0.120] | 0.054 [0.022; 0.114] | 0.433   | 0.044 [0.029; 0.126] | 0.058 [0.026; 0.159] | 0.530        |
| exhausted                 | 0.049 [0.030; 0.084] | 0.058 [0.031; 0.098] | 0.638   | 0.076 [0.041; 0.199] | 0.099 [0.053; 0.147] | 0.480        |
| terminal effector         | 0.036 [0.015; 0.105] | 0.032 [0.012; 0.090] | 0.109   | 0.030 [0.022; 0.116] | 0.046 [0.019; 0.135] | 0.937        |
| HLA-DR+                   | 0.049 [0.026; 0.106] | 0.074 [0.025; 0.120] | 0.826   | 0.092 [0.039; 0.207] | 0.123 [0.039; 0.202] | 0.583        |
| CD69+                     | 0.027 [0.011; 0.118] | 0.031 [0.017; 0.085] | 0.331   | 0.040 [0.029; 0.060] | 0.056 [0.030; 0.080] | 0.388        |
| regulatory                | 0.001 [0.000; 0.003] | 0.001 [0.000; 0.001] | 0.530   | 0.000 [0.000; 0.002] | 0.001 [0.000; 0.003] | 0.333        |
| CD25+                     | 0.000 [0.000; 0.001] | 0.001 [0.000; 0.001] | 0.363   | 0.001 [0.000; 0.001] | 0.001 [0.000; 0.001] | 0.433        |
| <b>CD4+ T Lymphocytes</b> |                      |                      |         |                      |                      |              |
| CD4+ Lymphocytes          | 0.435 [0.322; 0.801] | 0.384 [0.177; 0.655] | 0.109   | 0.690 [0.394; 0.987] | 0.496 [0.297; 0.918] | 0.583        |
| memory                    | 0.282 [0.172; 0.459] | 0.290 [0.153; 0.325] | 0.158   | 0.418 [0.251; 0.591] | 0.346 [0.179; 0.587] | 0.638        |
| central memory            | 0.199 [0.126; 0.336] | 0.170 [0.075; 0.256] | 0.096   | 0.252 [0.135; 0.342] | 0.192 [0.113; 0.353] | 0.480        |
| naive                     | 0.153 [0.048; 0.330] | 0.104 [0.031; 0.260] | 0.198   | 0.251 [0.070; 0.398] | 0.127 [0.058; 0.360] | 0.117        |
| effector memory           | 0.086 [0.050; 0.153] | 0.082 [0.068; 0.127] | 0.594   | 0.155 [0.111; 0.233] | 0.200 [0.064; 0.254] | 0.814        |
| EMRA                      | 0.003 [0.001; 0.012] | 0.004 [0.001; 0.016] | 0.470   | 0.014 [0.005; 0.028] | 0.008 [0.003; 0.025] | 0.638        |
| HLA-DR+                   | 0.051 [0.039; 0.068] | 0.046 [0.037; 0.068] | 0.683   | 0.071 [0.048; 0.114] | 0.058 [0.031; 0.180] | 0.814        |
| CD69+                     | 0.043 [0.037; 0.068] | 0.035 [0.020; 0.043] | 0.074   | 0.068 [0.034; 0.124] | 0.053 [0.021; 0.109] | 0.182        |



|            |                      |                      |       |                      |                      |       |
|------------|----------------------|----------------------|-------|----------------------|----------------------|-------|
| Th1        | 0.021 [0.014; 0.048] | 0.023 [0.011; 0.038] | 0.173 | 0.052 [0.027; 0.075] | 0.056 [0.016; 0.081] | 0.433 |
| Th2        | 0.047 [0.017; 0.091] | 0.041 [0.021; 0.070] | 0.650 | 0.058 [0.028; 0.092] | 0.046 [0.024; 0.103] | 0.937 |
| Th17       | 0.032 [0.016; 0.048] | 0.033 [0.023; 0.047] | 0.861 | 0.036 [0.021; 0.058] | 0.027 [0.012; 0.104] | 0.695 |
| regulatory | 0.024 [0.010; 0.044] | 0.012 [0.007; 0.034] | 0.048 | 0.027 [0.021; 0.050] | 0.015 [0.010; 0.035] | 0.530 |
| CD25+      | 0.005 [0.003; 0.011] | 0.008 [0.003; 0.012] | 0.778 | 0.012 [0.007; 0.016] | 0.012 [0.008; 0.019] | 0.308 |
| CD4/CD8    | 2.211 [1.758; 4.899] | 1.778 [1.231; 3.765] | 0.272 | 2.813 [1.535; 3.699] | 1.854 [1.353; 3.334] | 0.182 |

|                    | <b>Men (n=14)</b>          |                           | <b>P value</b> | <b>Women (n=12)</b>        |                           | <b>P value</b> |
|--------------------|----------------------------|---------------------------|----------------|----------------------------|---------------------------|----------------|
|                    | <b>Before chemotherapy</b> | <b>After chemotherapy</b> |                | <b>Before chemotherapy</b> | <b>After chemotherapy</b> |                |
| <b>NK cells</b>    |                            |                           |                |                            |                           |                |
| NK Cells           | 0.127 [0.080; 0.283]       | 0.126 [0.065; 0.292]      | 0.701          | 0.133 [0.114; 0.194]       | 0.128 [0.082; 0.192]      | 0.530          |
| CD56+CD16+         | 0.032 [0.018; 0.120]       | 0.047 [0.016; 0.079]      | 0.182          | 0.039 [0.016; 0.064]       | 0.019 [0.006; 0.067]      | 0.239          |
| CD56bright CD16dim | 0.003 [0.000; 0.006]       | 0.003 [0.001; 0.008]      | 0.158          | 0.003 [0.001; 0.007]       | 0.003 [0.001; 0.005]      | 0.530          |
| CD56dim CD16bright | 0.004 [0.002; 0.015]       | 0.006 [0.002; 0.010]      | 0.875          | 0.004 [0.003; 0.018]       | 0.007 [0.001; 0.009]      | 0.388          |
| NK/T               | 0.044 [0.025; 0.129]       | 0.061 [0.024; 0.084]      | 0.650          | 0.047 [0.025; 0.082]       | 0.025 [0.014; 0.079]      | 0.754          |

### **B) With G-CSF administration vs. Without G-CSF administration**

|                      | <b>with G-CSF administration (n=15)</b> |                           |                | <b>without G-CSF administration (n=11)</b> |                           |                |
|----------------------|-----------------------------------------|---------------------------|----------------|--------------------------------------------|---------------------------|----------------|
|                      | <b>Before chemotherapy</b>              | <b>After chemotherapy</b> | <b>P value</b> | <b>Before chemotherapy</b>                 | <b>After chemotherapy</b> | <b>P value</b> |
| <b>B Lymphocytes</b> |                                         |                           |                |                                            |                           |                |
| B Lymphocytes        | 0.070 [0.028; 0.104]                    | 0.038 [0.013; 0.054]      | <b>0.013</b>   | 0.145 [0.048; 0.190]                       | 0.070 [0.044; 0.134]      | 0.022          |
| naive                | 0.041 [0.013; 0.059]                    | 0.021 [0.005; 0.036]      | <b>0.019</b>   | 0.084 [0.028; 0.148]                       | 0.053 [0.017; 0.094]      | <b>0.017</b>   |
| memory               | 0.003 [0.001; 0.007]                    | 0.002 [0.001; 0.003]      | <b>0.019</b>   | 0.006 [0.003; 0.014]                       | 0.004 [0.002; 0.005]      | <b>0.013</b>   |
| class switched       | 0.006 [0.003; 0.015]                    | 0.004 [0.002; 0.006]      | 0.055          | 0.018 [0.009; 0.032]                       | 0.010 [0.006; 0.020]      | 0.074          |
| transitory           | 0.001 [0.000; 0.004]                    | 0.000 [0.000; 0.004]      | 0.754          | 0.003 [0.000; 0.005]                       | 0.005 [0.000; 0.002]      | 0.169          |

|                           | <b>with G-CSF administration (n=15)</b> |                           |                | <b>without G-CSF administration (n=11)</b> |                           |                |
|---------------------------|-----------------------------------------|---------------------------|----------------|--------------------------------------------|---------------------------|----------------|
|                           | <b>Before chemotherapy</b>              | <b>After chemotherapy</b> | <b>P value</b> | <b>Before chemotherapy</b>                 | <b>After chemotherapy</b> | <b>P value</b> |
| <b>CD8+ T Lymphocytes</b> |                                         |                           |                |                                            |                           |                |
| CD8+ Lymphocytes          | 0.221 [0.084; 0.314]                    | 0.217 [0.100; 0.300]      | 0.776          | 0.206 [0.186; 0.460]                       | 0.284 [0.189; 0.344]      | 0.929          |
| CD4+CD8+                  | 0.004 [0.001; 0.011]                    | 0.004 [0.001; 0.015]      | 0.730          | 0.007 [0.002; 0.017]                       | 0.003 [0.002; 0.011]      | 0.131          |
| memory                    | 0.052 [0.034; 0.110]                    | 0.079 [0.034; 0.121]      | 0.078          | 0.104 [0.053; 0.134]                       | 0.093 [0.034; 0.164]      | 0.929          |
| central memory            | 0.022 [0.007; 0.061]                    | 0.023 [0.015; 0.055]      | 0.363          | 0.034 [0.027; 0.084]                       | 0.025 [0.023; 0.046]      | 0.286          |
| naive                     | 0.035 [0.012; 0.089]                    | 0.033 [0.008; 0.037]      | 0.112          | 0.047 [0.031; 0.097]                       | 0.059 [0.028; 0.116]      | 0.790          |
| effector memory           | 0.048 [0.033; 0.106]                    | 0.066 [0.030; 0.123]      | 0.334          | 0.079 [0.039; 0.144]                       | 0.079 [0.027; 0.118]      | 0.534          |
| EMRA                      | 0.034 [0.020; 0.120]                    | 0.056 [0.025; 0.120]      | 0.910          | 0.056 [0.038; 0.102]                       | 0.068 [0.037; 0.146]      | 0.722          |
| early                     | 0.068 [0.036; 0.178]                    | 0.073 [0.049; 0.158]      | 0.776          | 0.137 [0.070; 0.165]                       | 0.224 [0.063; 0.229]      | 0.248          |
| intermediate              | 0.011 [0.005; 0.017]                    | 0.014 [0.006; 0.017]      | 0.112          | 0.010 [0.009; 0.029]                       | 0.015 [0.010; 0.037]      | 0.477          |
| late                      | 0.032 [0.020; 0.142]                    | 0.039 [0.016; 0.119]      | 0.609          | 0.052 [0.034; 0.108]                       | 0.054 [0.033; 0.163]      | 0.722          |
| exhausted                 | 0.051 [0.032; 0.079]                    | 0.058 [0.035; 0.128]      | 0.910          | 0.084 [0.038; 0.195]                       | 0.095 [0.057; 0.115]      | 0.657          |

|                   |                      |                      |       |                      |                      |       |
|-------------------|----------------------|----------------------|-------|----------------------|----------------------|-------|
| terminal effector | 0.037 [0.016; 0.116] | 0.022 [0.009; 0.101] | 0.088 | 0.030 [0.022; 0.085] | 0.038 [0.023; 0.111] | 0.929 |
| HLA-DR+           | 0.093 [0.016; 0.139] | 0.091 [0.021; 0.157] | 0.955 | 0.062 [0.032; 0.092] | 0.074 [0.035; 0.137] | 0.424 |
| CD69+             | 0.041 [0.014; 0.075] | 0.046 [0.019; 0.076] | 0.955 | 0.035 [0.027; 0.057] | 0.040 [0.023; 0.081] | 0.929 |
| regulatory        | 0.000 [0.000; 0.001] | 0.001 [0.000; 0.002] | 0.929 | 0.001 [0.000; 0.002] | 0.001 [0.000; 0.002] | 0.859 |
| CD25+             | 0.000 [0.000; 0.001] | 0.001 [0.000; 0.001] | 0.256 | 0.001 [0.000; 0.002] | 0.001 [0.000; 0.001] | 0.248 |

|                           | with G-CSF administration (n=15) |                      |         | without G-CSF administration (n=11) |                      |         |
|---------------------------|----------------------------------|----------------------|---------|-------------------------------------|----------------------|---------|
|                           | Before chemotherapy              | After chemotherapy   | P value | Before chemotherapy                 | After chemotherapy   | P value |
| <b>CD4+ T Lymphocytes</b> |                                  |                      |         |                                     |                      |         |
| CD4+ Lymphocytes          | 0.453 [0.189; 0.700]             | 0.374 [0.168; 0.667] | 0.363   | 0.718 [0.388; 1.162]                | 0.590 [0.437; 0.716] | 0.213   |
| memory                    | 0.282 [0.133; 0.482]             | 0.288 [0.113; 0.328] | 0.733   | 0.435 [0.296; 0.665]                | 0.315 [0.255; 0.444] | 0.213   |
| central memory            | 0.199 [0.073; 0.301]             | 0.165 [0.057; 0.254] | 0.256   | 0.235 [0.178; 0.469]                | 0.230 [0.127; 0.298] | 0.182   |
| naive                     | 1.242 [0.049; 0.327]             | 0.056 [0.017; 0.137] | 0.047   | 0.276 [0.088; 0.370]                | 0.225 [0.085; 0.308] | 0.534   |
| effector memory           | 0.101 [0.050; 0.184]             | 0.082 [0.061; 0.187] | 0.334   | 0.142 [0.109; 0.254]                | 0.118 [0.081; 0.203] | 0.182   |
| EMRA                      | 0.006 [0.001; 0.012]             | 0.003 [0.002; 0.005] | 0.334   | 0.017 [0.004; 0.022]                | 0.016 [0.006; 0.031] | 0.286   |
| HLA-DR+                   | 0.050 [0.038; 0.080]             | 0.045 [0.036; 0.070] | 0.776   | 0.068 [0.055; 0.095]                | 0.047 [0.037; 0.172] | 0.374   |
| CD69+                     | 0.040 [0.020; 0.091]             | 0.035 [0.024; 0.042] | 0.334   | 0.053 [0.035; 0.126]                | 0.046 [0.019; 0.073] | 0.050   |
| Th1                       | 0.021 [0.016; 0.045]             | 0.020 [0.010; 0.037] | 0.300   | 0.055 [0.044; 0.082]                | 0.047 [0.023; 0.084] | 0.213   |
| Th2                       | 0.041 [0.016; 0.096]             | 0.037 [0.011; 0.070] | 0.875   | 0.062 [0.029; 0.085]                | 0.053 [0.027; 0.102] | 0.534   |
| Th17                      | 0.032 [0.019; 0.058]             | 0.031 [0.010; 0.047] | 0.826   | 0.033 [0.020; 0.051]                | 0.028 [0.024; 0.059] | 1.0     |
| regulatory                | 0.020 [0.012; 0.042]             | 0.013 [0.010; 0.040] | 0.156   | 0.028 [0.021; 0.050]                | 0.011 [0.009; 0.020] | 0.328   |
| CD25+                     | 0.008 [0.003; 0.022]             | 0.008 [0.007; 0.018] | 0.211   | 0.008 [0.006; 0.013]                | 0.009 [0.003; 0.012] | 1.0     |
| CD4/CD8                   | 0.258 [1.723; 3.547]             | 1.685 [1.119; 3.504] | 0.281   | 3.482 [1.571; 3.970]                | 1.872 [1.343; 3.463] | 0.213   |

|                    | with G-CSF administration (n=15) |                      |         | without G-CSF administration (n=11) |                      |         |
|--------------------|----------------------------------|----------------------|---------|-------------------------------------|----------------------|---------|
|                    | Before chemotherapy              | After chemotherapy   | P value | Before chemotherapy                 | After chemotherapy   | P value |
| <b>NK cells</b>    |                                  |                      |         |                                     |                      |         |
| NK Cells           | 0.131 [0.086; 0.232]             | 0.133 [0.074; 0.256] | 0.683   | 0.131 [0.099; 0.270]                | 0.126 [0.064; 0.200] | 0.534   |
| CD56+CD16+         | 0.031 [0.016; 0.099]             | 0.028 [0.009; 0.055] | 0.033   | 0.039 [0.023; 0.068]                | 0.049 [0.016; 0.074] | 0.722   |
| CD56bright CD16dim | 0.003 [0.000; 0.005]             | 0.003 [0.001; 0.006] | 0.507   | 0.003 [0.000; 0.007]                | 0.004 [0.002; 0.011] | 0.790   |
| CD56dim CD16bright | 0.004 [0.002; 0.021]             | 0.004 [0.003; 0.018] | 0.249   | 0.004 [0.003; 0.018]                | 0.007 [0.004; 0.013] | 0.790   |
| NK/T               | 0.046 [0.022; 0.116]             | 0.037 [0.014; 0.072] | 0.177   | 0.046 [0.028; 0.087]                | 0.066 [0.025; 0.084] | 0.790   |

**C) Platinum containing chemotherapy vs. No platinum containing chemotherapy**

|                      | Platinum containing chemotherapy (n=19) |                      |              | No platinum containing chemotherapy (n=7) |                      |         |
|----------------------|-----------------------------------------|----------------------|--------------|-------------------------------------------|----------------------|---------|
|                      | Before chemotherapy                     | After chemotherapy   | P value      | Before chemotherapy                       | After chemotherapy   | P value |
| <b>B Lymphocytes</b> |                                         |                      |              |                                           |                      |         |
| B Lymphocytes        | 0.073 [0.039; 0.158]                    | 0.045 [0.018; 0.079] | <b>0.002</b> | 0.109 [0.048; 0.166]                      | 0.072 [0.049; 0.118] | 0.138   |
| naive                | 0.042 [0.021; 0.138]                    | 0.023 [0.009; 0.046] | <b>0.003</b> | 0.065 [0.020; 0.102]                      | 0.056 [0.020; 0.077] | 0.138   |
| memory               | 0.003 [0.001; 0.007]                    | 0.002 [0.001; 0.004] | <b>0.007</b> | 0.006 [0.003; 0.012]                      | 0.004 [0.002; 0.004] | 0.043   |

|                |                      |                      |              |                      |                      |       |
|----------------|----------------------|----------------------|--------------|----------------------|----------------------|-------|
| class switched | 0.001; 0.005; 0.018] | 0.004 [0.003; 0.008] | <b>0.018</b> | 0.010 [0.009; 0.032] | 0.012 [0.006; 0.019] | 0.345 |
| transitory     | 0.002 [0.000; 0.005] | 0.000 [0.000; 0.002] | 0.287        | 0.001 [0.002; 0.003] | 0.001 [0.000; 0.002] | 0.893 |

|                           | Platinum containing chemotherapy (n=19) |                      |              | No platinum containing chemotherapy (n=7) |                      |         |
|---------------------------|-----------------------------------------|----------------------|--------------|-------------------------------------------|----------------------|---------|
|                           | Before chemotherapy                     | After chemotherapy   | P value      | Before chemotherapy                       | After chemotherapy   | P value |
| <b>CD8+ T Lymphocytes</b> |                                         |                      |              |                                           |                      |         |
| CD8+ Lymphocytes          | 0.241 [0.141; 0.384]                    | 0.253 [0.126; 0.315] | 0.243        | 0.194 [0.087; 0.206]                      | 0.220 [0.094; 0.644] | 0.237   |
| CD4+CD8+                  | 0.008 [0.002; 0.017]                    | 0.005 [0.003; 0.015] | 0.601        | 0.002 [0.001; 0.005]                      | 0.002 [0.001; 0.003] | 0.249   |
| memory                    | 0.088 [0.044; 0.133]                    | 0.079 [0.044; 0.114] | 0.601        | 0.055 [0.023; 0.124]                      | 0.120 [0.022; 0.164] | 0.499   |
| central memory            | 0.028 [0.017; 0.076]                    | 0.025 [0.015; 0.058] | 0.243        | 0.028 [0.001; 0.045]                      | 0.025 [0.016; 0.035] | 0.499   |
| naive                     | 0.042 [0.015; 0.101]                    | 0.034 [0.017; 0.064] | 0.314        | 0.043 [0.018; 0.049]                      | 0.035 [0.016; 0.072] | 1.00    |
| effector memory           | 0.062 [0.045; 0.110]                    | 0.067 [0.031; 0.092] | 0.841        | 0.039 [0.018; 0.101]                      | 0.118 [0.021; 0.154] | 0.398   |
| EMRA                      | 0.063 [0.022; 0.120]                    | 0.068 [0.025; 0.119] | 0.295        | 0.038 [0.023; 0.056]                      | 0.068 [0.032; 0.397] | 0.063   |
| early                     | 0.132 [0.055; 0.180]                    | 0.082 [0.053; 0.211] | 0.334        | 0.076 [0.038; 0.139]                      | 0.063 [0.027; 0.114] | 0.735   |
| intermediate              | 0.012 [0.008; 0.020]                    | 0.014 [0.007; 0.017] | 0.260        | 0.009 [0.004; 0.017]                      | 0.017 [0.008; 0.037] | 0.176   |
| late                      | 0.054 [0.020; 0.142]                    | 0.039 [0.023; 0.119] | 0.099        | 0.035 [0.025; 0.108]                      | 0.078 [0.052; 0.496] | 0.128   |
| exhausted                 | 0.073 [0.035; 0.105]                    | 0.065 [0.036; 0.104] | 0.629        | 0.038 [0.030; 0.112]                      | 0.115 [0.021; 0.160] | 0.735   |
| terminal effector         | 0.037 [0.022; 0.116]                    | 0.027 [0.011; 0.101] | <b>0.013</b> | 0.023 [0.019; 0.085]                      | 0.046 [0.023; 0.244] | 0.176   |
| HLA-DR+                   | 0.092 [0.042; 0.139]                    | 0.074 [0.035; 0.137] | 0.469        | 0.033 [0.029; 0.070]                      | 0.108 [0.026; 0.479] | 0.063   |
| CD69+                     | 0.039 [0.018; 0.075]                    | 0.037 [0.023; 0.071] | 0.546        | 0.035 [0.011; 0.057]                      | 0.068 [0.010; 0.123] | 0.398   |
| regulatory                | 0.001 [0.000; 0.002]                    | 0.001 [0.000; 0.002] | 0.820        | 0.000 [0.000; 0.002]                      | 0.001 [0.000; 0.002] | 0.735   |
| CD25+                     | 0.001 [0.000; 0.001]                    | 0.001 [0.000; 0.001] | 0.717        | 0.000 [0.000; 0.002]                      | 0.000 [0.000; 0.001] | 0.735   |

|                           | Platinum containing chemotherapy (n=19) |                      |         | No platinum containing chemotherapy (n=7) |                      |         |
|---------------------------|-----------------------------------------|----------------------|---------|-------------------------------------------|----------------------|---------|
|                           | Before chemotherapy                     | After chemotherapy   | P value | Before chemotherapy                       | After chemotherapy   | P value |
| <b>CD4+ T Lymphocytes</b> |                                         |                      |         |                                           |                      |         |
| CD4+ Lymphocytes          | 0.519 [0.379; 0.888]                    | 0.442 [0.192; 0.667] | 0.107   | 0.650 [0.330; 0.773]                      | 0.653 [0.250; 0.716] | 0.735   |
| memory                    | 0.296 [0.227; 0.501]                    | 0.301 [0.137; 0.376] | 0.171   | 0.324 [0.223; 0.441]                      | 0.301 [0.158; 0.444] | 0.735   |
| central memory            | 0.199 [0.132; 0.357]                    | 0.174 [0.064; 0.296] | 0.099   | 0.235 [0.144; 0.322]                      | 0.230 [0.111; 0.262] | 0.499   |
| naive                     | 0.124 [0.053; 0.338]                    | 0.074 [0.034; 0.225] | 0.024   | 0.276 [0.088; 0.300]                      | 0.244 [0.085; 0.308] | 0.866   |
| effector memory           | 0.123 [0.062; 0.205]                    | 0.083 [0.065; 0.203] | 0.520   | 0.115 [0.079; 0.165]                      | 0.118 [0.079; 0.197] | 1.0     |
| EMRA                      | 0.008 [0.002; 0.017]                    | 0.004 [0.002; 0.016] | 0.421   | 0.008 [0.004; 0.021]                      | 0.010 [0.006; 0.031] | 0.237   |
| HLA-DR+                   | 0.055 [0.044; 0.080]                    | 0.044 [0.036; 0.070] | 0.334   | 0.068 [0.028; 0.095]                      | 0.072 [0.045; 0.175] | 0.499   |
| CD69+                     | 0.049 [0.027; 0.116]                    | 0.032 [0.019; 0.042] | 0.027   | 0.053 [0.032; 0.172]                      | 0.071 [0.035; 0.077] | 0.499   |
| Th1                       | 0.040 [0.018; 0.053]                    | 0.023 [0.011; 0.041] | 0.048   | 0.066 [0.018; 0.082]                      | 0.052 [0.014; 0.084] | 1.0     |
| Th2                       | 0.051 [0.022; 0.096]                    | 0.038 [0.021; 0.082] | 0.879   | 0.049 [0.029; 0.085]                      | 0.053 [0.024; 0.074] | 0.612   |
| Th17                      | 0.037 [0.025; 0.058]                    | 0.031 [0.019; 0.047] | 0.349   | 0.022 [0.017; 0.040]                      | 0.032 [0.022; 0.059] | 0.310   |
| regulatory                | 0.028 [0.015; 0.050]                    | 0.012 [0.009; 0.031] | 0.036   | 0.024 [0.020; 0.046]                      | 0.020 [0.010; 0.079] | 0.866   |
| CD25+                     | 0.008 [0.005; 0.016]                    | 0.009 [0.007; 0.014] | 0.445   | 0.008 [0.004; 0.013]                      | 0.008 [0.002; 0.015] | 0.735   |

|         |                      |                      |       |                      |                      |       |
|---------|----------------------|----------------------|-------|----------------------|----------------------|-------|
| CD4/CD8 | 2.084 [1.571; 3.547] | 2.872 [1.343; 3.475] | 0.243 | 3.800 [2.258; 4.928] | 1.776 [1.111; 4.083] | 0.310 |
|---------|----------------------|----------------------|-------|----------------------|----------------------|-------|

**Platinum containing chemotherapy (n=19)**

**No platinum containing chemotherapy (n=7)**

|                    | Before chemotherapy  | After chemotherapy   | P value      | Before chemotherapy  | After chemotherapy   | P value |
|--------------------|----------------------|----------------------|--------------|----------------------|----------------------|---------|
| <b>NK cells</b>    |                      |                      |              |                      |                      |         |
| NK Cells           | 0.152 [0.104; 0.296] | 0.126 [0.069; 0.256] | 0.122        | 0.109 [0.087; 0.137] | 0.129 [0.115; 0.209] | 0.310   |
| CD56+CD16+         | 0.029 [0.016; 0.090] | 0.019 [0.011; 0.051] | <b>0.006</b> | 0.047 [0.027; 0.089] | 0.072 [0.028; 0.078] | 0.600   |
| CD56bright CD16dim | 0.003 [0.000; 0.005] | 0.003 [0.001; 0.006] | 0.420        | 0.005 [0.001; 0.012] | 0.003 [0.002; 0.013] | 0.753   |
| CD56dim CD16bright | 0.004 [0.002; 0.019] | 0.006 [0.001; 0.009] | 0.248        | 0.004 [0.003; 0.018] | 0.006 [0.002; 0.020] | 0.463   |
| NK/T               | 0.044 [0.022; 0.110] | 0.027 [0.015; 0.072] | 0.064        | 0.062 [0.029; 0.110] | 0.084 [0.037; 0.159] | 0.463   |

**D) CR + PR vs. SD + PD**

|                      | CR + PR (n=11)<br>Before chemotherapy | After chemotherapy   | P value | SD + PD (n=15)<br>Before chemotherapy | After chemotherapy   | P value      |
|----------------------|---------------------------------------|----------------------|---------|---------------------------------------|----------------------|--------------|
| <b>B Lymphocytes</b> |                                       |                      |         |                                       |                      |              |
| B Lymphocytes        | 0.082 [0.073; 0.181]                  | 0.049 [0.038; 0.106] | 0.041   | 0.066 [0.036; 0.158]                  | 0.044 [0.017; 0.110] | <b>0.006</b> |
| naive                | 0.058 [0.022; 0.145]                  | 0.025 [0.016; 0.051] | 0.026   | 0.041 [0.020; 0.102]                  | 0.028 [0.007; 0.086] | <b>0.012</b> |
| memory               | 0.004 [0.003; 0.007]                  | 0.003 [0.002; 0.005] | 0.091   | 0.003 [0.001; 0.013]                  | 0.001 [0.001; 0.004] | <b>0.005</b> |
| class switched       | 0.015 [0.009; 0.029]                  | 0.009 [0.004; 0.020] | 0.213   | 0.008 [0.003; 0.015]                  | 0.004 [0.002; 0.006] | <b>0.012</b> |
| transitory           | 0.001 [0.000; 0.003]                  | 0.000 [0.000; 0.002] | 0.799   | 0.003 [0.001; 0.005]                  | 0.000 [0.000; 0.002] | 0.272        |

|                           | CR + PR (n=11)<br>Before chemotherapy | After chemotherapy   | P value | SD + PD (n=15)<br>Before chemotherapy | After chemotherapy   | P value |
|---------------------------|---------------------------------------|----------------------|---------|---------------------------------------|----------------------|---------|
| <b>CD8+ T Lymphocytes</b> |                                       |                      |         |                                       |                      |         |
| CD8+ Lymphocytes          | 0.241 [0.201; 0.314]                  | 0.300 [0.216; 0.393] | 0.155   | 0.178 [0.084; 0.482]                  | 0.161 [0.080; 0.284] | 0.156   |
| CD4+CD8+                  | 0.008 [0.002; 0.017]                  | 0.005 [0.003; 0.018] | 0.594   | 0.003 [0.001; 0.010]                  | 0.003 [0.001; 0.006] | 0.056   |
| memory                    | 0.109 [0.055; 0.134]                  | 0.121 [0.076; 0.182] | 0.091   | 0.049 [0.029; 0.104]                  | 0.070 [0.030; 0.105] | 0.650   |
| central memory            | 0.048 [0.027; 0.076]                  | 0.036 [0.025; 0.058] | 0.534   | 0.021 [0.007; 0.039]                  | 0.017 [0.012; 0.028] | 0.281   |
| naive                     | 0.042 [0.029; 0.088]                  | 0.037 [0.027; 0.064] | 0.722   | 0.043 [0.015; 0.101]                  | 0.034 [0.016; 0.079] | 0.394   |
| effector memory           | 0.064 [0.053; 0.113]                  | 0.100 [0.063; 0.154] | 0.091   | 0.046 [0.024; 0.106]                  | 0.055 [0.026; 0.080] | 0.363   |
| EMRA                      | 0.063 [0.034; 0.120]                  | 0.105 [0.068; 0.121] | 0.075   | 0.042 [0.022; 0.087]                  | 0.044 [0.025; 0.068] | 0.256   |
| early                     | 0.145 [0.070; 0.178]                  | 0.110 [0.072; 0.229] | 0.929   | 0.068 [0.036; 0.139]                  | 0.064 [0.027; 0.129] | 0.125   |
| intermediate              | 0.010 [0.006; 0.012]                  | 0.015 [0.013; 0.031] | 0.033   | 0.015 [0.005; 0.020]                  | 0.012 [0.006; 0.017] | 0.570   |
| late                      | 0.074 [0.032; 0.155]                  | 0.096 [0.054; 0.247] | 0.477   | 0.035 [0.020; 0.079]                  | 0.033 [0.023; 0.105] | 0.334   |
| exhausted                 | 0.073 [0.050; 0.084]                  | 0.095 [0.057; 0.015] | 0.328   | 0.038 [0.032; 0.112]                  | 0.059 [0.027; 0.104] | 0.211   |
| terminal effector         | 0.093 [0.019; 0.141]                  | 0.066 [0.023; 0.144] | 0.859   | 0.026 [0.022; 0.046]                  | 0.022 [0.011; 0.055] | 0.233   |
| HLA-DR+                   | 0.094 [0.042; 0.139]                  | 0.114 [0.074; 0.217] | 0.131   | 0.053 [0.016; 0.093]                  | 0.048 [0.020; 0.135] | 0.496   |
| CD69+                     | 0.041 [0.029; 0.198]                  | 0.076 [0.026; 0.129] | 0.859   | 0.029 [0.011; 0.055]                  | 0.037 [0.010; 0.065] | 0.865   |
| regulatory                | 0.001 [0.000; 0.004]                  | 0.001 [0.000; 0.003] | 0.646   | 0.000 [0.000; 0.001]                  | 0.001 [0.000; 0.001] | 0.695   |
| CD25+                     | 0.001 [0.000; 0.002]                  | 0.001 [0.000; 0.001] | 0.286   | 0.000 [0.000; 0.001]                  | 0.001 [0.000; 0.001] | 0.256   |

|                           | CR + PR (n=11)<br>Before chemotherapy | After chemotherapy | P value | SD + PD (n=15)<br>Before chemotherapy | After chemotherapy | P value |
|---------------------------|---------------------------------------|--------------------|---------|---------------------------------------|--------------------|---------|
| <b>CD4+ T Lymphocytes</b> |                                       |                    |         |                                       |                    |         |

|                  |                      |                      |       |                      |                      |              |
|------------------|----------------------|----------------------|-------|----------------------|----------------------|--------------|
| CD4+ Lymphocytes | 0.650 [0.388; 0.888] | 0.590 [0.252; 0.716] | 0.328 | 0.519 [0.299; 0.773] | 0.437 [0.181; 0.661] | 0.233        |
| memory           | 0.358 [0.296; 0.591] | 0.328 [0.193; 0.444] | 0.477 | 0.282 [0.197; 0.482] | 0.288 [0.154; 0.322] | 0.256        |
| central memory   | 0.268 [0.199; 0.373] | 0.230 [0.120; 0.298] | 0.182 | 0.185 [0.111; 0.299] | 0.165 [0.078; 0.262] | 0.233        |
| naive            | 0.244 [0.069; 0.327] | 0.116 [0.034; 0.261] | 0.328 | 0.182 [0.053; 0.338] | 0.091 [0.039; 0.308] | 0.100        |
| effector memory  | 0.135 [0.070; 0.202] | 0.128 [0.072; 0.197] | 1.0   | 0.106 [0.055; 0.205] | 0.085 [0.061; 0.203] | 0.496        |
| EMRA             | 0.114 [0.003; 0.022] | 0.016 [0.004; 0.031] | 0.374 | 0.008 [0.001; 0.017] | 0.004 [0.002; 0.010] | 0.460        |
| HLA-DR+          | 0.080 [0.044; 0.095] | 0.053 [0.037; 0.175] | 0.929 | 0.055 [0.038; 0.071] | 0.045 [0.031; 0.072] | 0.427        |
| CD69+            | 0.050 [0.032; 0.172] | 0.037 [0.015; 0.077] | 0.182 | 0.049 [0.025; 0.091] | 0.035 [0.024; 0.047] | 0.061        |
| Th1              | 0.044 [0.021; 0.066] | 0.036 [0.021; 0.052] | 0.424 | 0.031 [0.016; 0.072] | 0.021 [0.011; 0.062] | 0.177        |
| Th2              | 0.068 [0.045; 0.107] | 0.062 [0.021; 0.103] | 0.374 | 0.032 [0.018; 0.082] | 0.029 [0.024; 0.073] | 0.875        |
| Th17             | 0.040 [0.017; 0.056] | 0.043 [0.024; 0.059] | 0.722 | 0.027 [0.020; 0.053] | 0.026 [0.021; 0.047] | 0.975        |
| regulatory       | 0.020 [0.015; 0.050] | 0.040 [0.010; 0.079] | 0.477 | 0.028 [0.015; 0.042] | 0.012 [0.009; 0.016] | <b>0.001</b> |
| CD25+            | 0.009 [0.004; 0.017] | 0.012 [0.008; 0.015] | 0.477 | 0.008 [0.005; 0.013] | 0.008 [0.003; 0.012] | 0.496        |
| CD4/CD8          | 2.548 [1.571; 4.928] | 1.381 [1.111; 2.116] | 0.101 | 2.258 [1.723; 3.800] | 1.960 [1.558; 4.548] | 0.865        |

**CR + PR (n=11)**

**Before chemotherapy**

**After chemotherapy**

**P value**

**SD + PD (n=15)**

**Before chemotherapy**

**After chemotherapy**

**P value**

**NK cells**

|                    |                      |                       |       |                      |                      |       |
|--------------------|----------------------|-----------------------|-------|----------------------|----------------------|-------|
| NK Cells           | 0.240 [0.124; 0.310] | 0.212 [0.127 ; 0.332] | 0.799 | 0.126 [0.077; 0.137] | 0.105 [0.056; 0.163] | 0.496 |
| CD56+CD16+         | 0.062 [0.030; 0.098] | 0.072 [0.046; 0.095]  | 0.721 | 0.024 [0.014; 0.048] | 0.019 [0.009; 0.043] | 0.048 |
| CD56bright CD16dim | 0.004 [0.000; 0.008] | 0.006 [0.001; 0.011]  | 0.445 | 0.002 [0.001; 0.005] | 0.003 [0.002; 0.004] | 0.975 |
| CD56dim CD16bright | 0.004 [0.003; 0.020] | 0.007 [0.004; 0.015]  | 0.646 | 0.004 [0.002; 0.016] | 0.004 [0.001; 0.008] | 0.177 |
| NK/T               | 0.078 [0.034; 0.124] | 0.084 [0.053; 0.117]  | 0.657 | 0.037 [0.016; 0.057] | 0.024 [0.013; 0.055] | 0.109 |

**E) Radiation vs. No Radiation**

**Radiation (n=8)**

**Before chemotherapy**

**After chemotherapy**

**P value**

**No radiation (n=18)**

**Before chemotherapy**

**After chemotherapy**

**P value**

**B Lymphocytes**

|                |                      |                      |              |                      |                      |              |
|----------------|----------------------|----------------------|--------------|----------------------|----------------------|--------------|
| B Lymphocytes  | 0.074 [0.046; 0.106] | 0.033 [0.009; 0.056] | 0.055        | 0.078 [0.038; 0.057] | 0.057 [0.037; 0.107] | 0.178        |
| naive          | 0.043 [0.026; 0.071] | 0.016 [0.002; 0.045] | 0.028        | 0.056 [0.018; 0.140] | 0.033 [0.017; 0.059] | <b>0.013</b> |
| memory         | 0.005 [0.003; 0.011] | 0.001 [0.000; 0.008] | 0.028        | 0.003 [0.001; 0.008] | 0.002 [0.001; 0.004] | <b>0.010</b> |
| class switched | 0.013 [0.007; 0.015] | 0.004 [0.003; 0.009] | <b>0.018</b> | 0.010 [0.003; 0.024] | 0.006 [0.004; 0.015] | 0.196        |
| transitory     | 0.003 [0.001; 0.005] | 0.000 [0.000; 0.006] | 0.735        | 0.001 [0.000; 0.005] | 0.001 [0.000; 0.002] | 0.281        |

**Radiation (n=8)**

**Before chemotherapy**

**After chemotherapy**

**P value**

**No radiation (n=18)**

**Before chemotherapy**

**After chemotherapy**

**P value**

**CD8+ T Lymphocytes**

|                  |                      |                      |       |                      |                      |       |
|------------------|----------------------|----------------------|-------|----------------------|----------------------|-------|
| CD8+ Lymphocytes | 0.244 [0.150; 0.455] | 0.235 [0.080; 0.337] | 0.123 | 0.204 [0.090; 0.331] | 0.233 [0.146; 0.319] | 0.500 |
| CD4+CD8+         | 0.010 [0.004; 0.017] | 0.009 [0.003; 0.018] | 0.484 | 0.003 [0.001; 0.009] | 0.003 [0.001; 0.006] | 0.554 |
| memory           | 0.070 [0.038; 0.140] | 0.081 [0.037; 0.118] | 0.484 | 0.059 [0.040; 0.126] | 0.091 [0.033; 0.153] | 0.372 |

|                   |                      |                      |       |                      |                      |       |
|-------------------|----------------------|----------------------|-------|----------------------|----------------------|-------|
| central memory    | 0.030 [0.009; 0.072] | 0.039 [0.015; 0.068] | 0.674 | 0.028 [0.016; 0.052] | 0.025 [0.016; 0.038] | 0.184 |
| naive             | 0.069 [0.019; 0.107] | 0.033 [0.017; 0.121] | 0.575 | 0.039 [0.016; 0.081] | 0.036 [0.016; 0.066] | 0.420 |
| effector memory   | 0.055 [0.043; 0.109] | 0.060 [0.031; 0.068] | 0.327 | 0.054 [0.031; 0.119] | 0.086 [0.029; 0.136] | 0.372 |
| EMRA              | 0.065 [0.029; 0.249] | 0.058 [0.024; 0.136] | 0.327 | 0.043 [0.022; 0.109] | 0.068 [0.036; 0.120] | 0.349 |
| early             | 0.147 [0.061; 0.275] | 0.127 [0.056; 0.241] | 0.093 | 0.073 [0.037; 0.150] | 0.072 [0.048; 0.150] | 0.811 |
| intermediate      | 0.017 [0.013; 0.020] | 0.014 [0.006; 0.047] | 0.263 | 0.010 [0.005; 0.013] | 0.014 [0.009; 0.021] | 0.157 |
| late              | 0.023 [0.016; 0.076] | 0.024 [0.014; 0.070] | 0.575 | 0.053 [0.032; 0.146] | 0.087 [0.032; 0.152] | 0.845 |
| exhausted         | 0.066 [0.039; 0.103] | 0.074 [0.042; 0.122] | 0.575 | 0.055 [0.032; 0.112] | 0.062 [0.034; 0.118] | 0.948 |
| terminal effector | 0.038 [0.024; 0.111] | 0.021 [0.010; 0.058] | 0.025 | 0.031 [0.018; 0.120] | 0.045 [0.018; 0.118] | 0.879 |
| HLA-DR+           | 0.085 [0.023; 0.207] | 0.069 [0.028; 0.148] | 0.674 | 0.057 [0.031; 0.109] | 0.085 [0.033; 0.163] | 0.349 |
| CD69+             | 0.046 [0.032; 0.071] | 0.052 [0.029; 0.091] | 0.889 | 0.030 [0.017; 0.066] | 0.041 [0.017; 0.073] | 0.983 |
| regulatory        | 0.000 [0.000; 0.002] | 0.001 [0.000; 0.003] | 0.866 | 0.000 [0.000; 0.002] | 0.001 [0.000; 0.002] | 1.0   |
| CD25+             | 0.001 [0.000; 0.001] | 0.001 [0.001; 0.001] | 0.263 | 0.001 [0.000; 0.001] | 0.001 [0.000; 0.001] | 0.446 |

|                           | Radiation (n=8)      |                      |              | No radiation (n=18)  |                      |         |
|---------------------------|----------------------|----------------------|--------------|----------------------|----------------------|---------|
|                           | Before chemotherapy  | After chemotherapy   | P value      | Before chemotherapy  | After chemotherapy   | P value |
| <b>CD4+ T Lymphocytes</b> |                      |                      |              |                      |                      |         |
| CD4+ Lymphocytes          | 0.486 [0.320; 0.976] | 0.418 [0.185; 0.906] | 0.484        | 0.819 [0.367; 0.802] | 0.485 [0.236; 0.674] | 0.145   |
| memory                    | 0.320 [0.206; 0.564] | 0.352 [0.147; 0.587] | 0.889        | 0.317 [0.226; 0.548] | 0.297 [0.157; 0.333] | 0.112   |
| central memory            | 0.249 [0.120; 0.343] | 0.191 [0.089; 0.353] | 0.401        | 0.220 [0.141; 0.336] | 0.157 [0.103; 0.256] | 0.133   |
| naive                     | 0.131 [0.057; 0.378] | 0.061 [0.024; 0.318] | <b>0.017</b> | 0.251 [0.069; 0.330] | 0.153 [0.038; 0.273] | 0.446   |
| effector memory           | 0.115 [0.064; 0.233] | 0.166 [0.065; 0.254] | 0.263        | 0.125 [0.065; 0.188] | 0.083 [0.068; 0.145] | 0.184   |
| EMRA                      | 0.112 [0.004; 0.015] | 0.004 [0.002; 0.009] | 0.069        | 0.005 [0.002; 0.022] | 0.008 [0.002; 0.029] | 0.306   |
| HLA-DR+                   | 0.057 [0.038; 0.071] | 0.058 [0.044; 0.156] | 0.263        | 0.058 [0.043; 0.090] | 0.046 [0.035; 0.079] | 0.199   |
| CD69+                     | 0.045 [0.026; 0.116] | 0.035 [0.030; 0.107] | 0.575        | 0.051 [0.031; 0.117] | 0.035 [0.018; 0.053] | 0.035   |
| Th1                       | 0.040 [0.018; 0.071] | 0.036 [0.015; 0.067] | 0.612        | 0.043 [0.018; 0.069] | 0.022 [0.012; 0.054] | 0.102   |
| Th2                       | 0.047 [0.028; 0.107] | 0.064 [0.027; 0.103] | 0.612        | 0.052 [0.023; 0.082] | 0.034 [0.021; 0.070] | 0.500   |
| Th17                      | 0.049 [0.026; 0.061] | 0.041 [0.013; 0.113] | 0.735        | 0.029 [0.019; 0.048] | 0.029 [0.021; 0.044] | 0.913   |
| regulatory                | 0.024 [0.016; 0.050] | 0.012 [0.010; 0.017] | 0.263        | 0.027 [0.014; 0.047] | 0.014 [0.008; 0.051] | 0.184   |
| CD25+                     | 0.007 [0.004; 0.011] | 0.008 [0.007; 0.012] | 0.208        | 0.009 [0.005; 0.016] | 0.010 [0.003; 0.016] | 0.777   |
| CD4/CD8                   | 2.108 [1.438; 3.297] | 2.024 [1.642; 3.344] | 0.889        | 2.973 [1.758; 4.677] | 1.579 [1.117; 3.627] | 0.078   |

|                    | Radiation (n=8)      |                      |         | No radiation (n=18)  |                      |         |
|--------------------|----------------------|----------------------|---------|----------------------|----------------------|---------|
|                    | Before chemotherapy  | After chemotherapy   | P value | Before chemotherapy  | After chemotherapy   | P value |
| <b>NK cells</b>    |                      |                      |         |                      |                      |         |
| NK Cells           | 0.152 [0.080; 0.273] | 0.119 [0.038; 0.258] | 0.263   | 0.129 [0.093; 0.240] | 0.127 [0.093; 0.204] | 0.943   |
| CD56+CD16+         | 0.025 [0.015; 0.083] | 0.016 [0.009; 0.050] | 0.123   | 0.039 [0.023; 0.083] | 0.046 [0.016; 0.079] | 0.379   |
| CD56bright CD16dim | 0.002 [0.000; 0.006] | 0.003 [0.001; 0.004] | 1.0     | 0.003 [0.001; 0.007] | 0.004 [0.001; 0.008] | 0.352   |
| CD56dim CD16bright | 0.005 [0.002; 0.022] | 0.007 [0.001; 0.009] | 0.093   | 0.004 [0.002; 0.017] | 0.006 [0.002; 0.010] | 0.606   |
| NK/T               | 0.041 [0.021; 0.113] | 0.024 [0.014; 0.063] | 0.161   | 0.057 [0.030; 0.098] | 0.061 [0.024; 0.092] | 0.943   |

**F) Infection vs. No Infection**

|                           | Infection (n=9)      |                      |         | No infection (n=17)  |                      |              |
|---------------------------|----------------------|----------------------|---------|----------------------|----------------------|--------------|
|                           | Before chemotherapy  | After chemotherapy   | P value | Before chemotherapy  | After chemotherapy   | P value      |
| <b>B Lymphocytes</b>      |                      |                      |         |                      |                      |              |
| B Lymphocytes             | 0.073 [0.020; 0.162] | 0.063 [0.014; 0.112] | 0.463   | 0.079 [0.044; 0.168] | 0.046 [0.029; 0.088] | <b>0.002</b> |
| naive                     | 0.054 [0.010; 0.120] | 0.048 [0.008; 0.070] | 0.345   | 0.045 [0.021; 0.116] | 0.023 [0.014; 0.047] | <b>0.001</b> |
| memory                    | 0.003 [0.002; 0.004] | 0.002 [0.001; 0.003] | 0.173   | 0.006 [0.002; 0.012] | 0.003 [0.001; 0.004] | <b>0.002</b> |
| class switched            | 0.009 [0.004; 0.013] | 0.004 [0.002; 0.010] | 0.600   | 0.015 [0.006; 0.026] | 0.006 [0.003; 0.014] | <b>0.009</b> |
| transitory                | 0.001 [0.000; 0.007] | 0.000 [0.000; 0.014] | 0.917   | 0.002 [0.000; 0.004] | 0.005 [0.000; 0.002] | 0.148        |
| <b>CD8+ T Lymphocytes</b> |                      |                      |         |                      |                      |              |
| CD8+ Lymphocytes          | 0.178 [0.087; 0.344] | 0.220 [0.121; 0.368] | 0.079   | 0.241 [0.168; 0.378] | 0.272 [0.113; 0.323] | 0.235        |
| CD4+CD8+                  | 0.002 [0.001; 0.006] | 0.003 [0.001; 0.004] | 0.401   | 0.008 [0.002; 0.017] | 0.005 [0.002; 0.014] | 0.554        |
| memory                    | 0.044 [0.035; 0.071] | 0.079 [0.039; 0.134] | 0.086   | 0.104 [0.052; 0.141] | 0.093 [0.033; 0.140] | 0.868        |
| central memory            | 0.021 [0.012; 0.031] | 0.025 [0.016; 0.032] | 0.314   | 0.045 [0.018; 0.080] | 0.027 [0.015; 0.057] | 0.028        |
| naive                     | 0.047 [0.010; 0.095] | 0.035 [0.013; 0.105] | 0.953   | 0.042 [0.022; 0.093] | 0.034 [0.024; 0.067] | 0.287        |
| effector memory           | 0.045 [0.028; 0.078] | 0.063 [0.033; 0.124] | 0.374   | 0.064 [0.044; 0.128] | 0.068 [0.029; 0.112] | 0.723        |
| EMRA                      | 0.024 [0.022; 0.202] | 0.068 [0.033; 0.154] | 0.767   | 0.062 [0.036; 0.113] | 0.068 [0.031; 0.116] | 0.981        |
| early                     | 0.078 [0.044; 0.135] | 0.072 [0.053; 0.183] | 0.678   | 0.137 [0.045; 0.179] | 0.096 [0.043; 0.186] | 0.356        |
| intermediate              | 0.010 [0.004; 0.019] | 0.017 [0.011; 0.042] | 0.066   | 0.011 [0.008; 0.020] | 0.013 [0.007; 0.023] | 0.523        |
| late                      | 0.034 [0.022; 0.075] | 0.096 [0.024; 0.131] | 0.314   | 0.069 [0.026; 0.149] | 0.052 [0.024; 0.134] | 0.193        |
| exhausted                 | 0.033 [0.023; 0.108] | 0.104 [0.031; 0.141] | 0.767   | 0.056 [0.042; 0.104] | 0.059 [0.037; 0.010] | 0.435        |
| terminal effector         | 0.026 [0.017; 0.048] | 0.046 [0.015; 0.094] | 0.678   | 0.036 [0.022; 0.129] | 0.027 [0.014; 0.106] | 0.076        |
| HLA-DR+                   | 0.042 [0.014; 0.152] | 0.108 [0.050; 0.178] | 0.260   | 0.092 [0.042; 0.133] | 0.068 [0.031; 0.147] | 0.653        |
| CD69+                     | 0.022 [0.013; 0.053] | 0.045 [0.016; 0.076] | 0.139   | 0.041 [0.028; 0.145] | 0.040 [0.021; 0.100] | 0.332        |
| regulatory                | 0.001 [0.000; 0.001] | 0.001 [0.000; 0.002] | 0.889   | 0.000 [0.000; 0.002] | 0.001 [0.000; 0.002] | 0.778        |
| CD25+                     | 0.000 [0.000; 0.001] | 0.001 [0.000; 0.001] | 0.314   | 0.001 [0.000; 0.002] | 0.001 [0.003; 0.001] | 0.523        |
| <b>CD4+ T Lymphocytes</b> |                      |                      |         |                      |                      |              |
| CD4+ Lymphocytes          | 0.417 [0.269; 0.684] | 0.374 [0.174; 1.111] | 0.237   | 0.679 [0.355; 1.025] | 0.549 [0.308; 0.691] | 0.543        |
| memory                    | 0.282 [0.149; 0.382] | 0.228 [0.147; 0.700] | 0.859   | 0.395 [0.229; 0.628] | 0.322 [0.223; 0.376] | 0.049        |
| central memory            | 0.185 [0.105; 0.255] | 0.140 [0.071; 0.417] | 0.859   | 0.268 [0.138; 0.421] | 0.202 [0.115; 0.279] | 0.028        |
| naive                     | 0.182 [0.048; 0.280] | 0.091 [0.028; 0.281] | 0.314   | 0.244 [0.072; 0.354] | 0.116 [0.045; 0.285] | 0.124        |
| effector memory           | 0.106 [0.051; 0.150] | 0.084 [0.067; 0.297] | 0.594   | 0.142 [0.070; 0.223] | 0.112 [0.067; 0.200] | 0.177        |
| EMRA                      | 0.006 [0.001; 0.025] | 0.003 [0.001; 0.012] | 0.953   | 0.008 [0.002; 0.018] | 0.005 [0.003; 0.022] | 0.868        |
| HLA-DR+                   | 0.053 [0.025; 0.068] | 0.067 [0.034; 0.168] | 0.515   | 0.068 [0.045; 0.092] | 0.046 [0.039; 0.086] | 0.193        |
| CD69+                     | 0.035 [0.018; 0.109] | 0.035 [0.023; 0.075] | 0.441   | 0.050 [0.033; 0.117] | 0.034 [0.017; 0.058] | 0.044        |
| Th1                       | 0.042 [0.013; 0.070] | 0.037 [0.009; 0.077] | 0.889   | 0.042 [0.019; 0.068] | 0.027 [0.017; 0.056] | 0.049        |

|                    |                            |                           |                |                            |                           |                |
|--------------------|----------------------------|---------------------------|----------------|----------------------------|---------------------------|----------------|
| Th2                | 0.031 [0.016; 0.063]       | 0.024 [0.021; 0.121]      | 0.208          | 0.062 [0.029; 0.102]       | 0.062 [0.028; 0.078]      | 0.210          |
| Th17               | 0.036 [0.022; 0.054]       | 0.031 [0.024; 0.082]      | 0.327          | 0.031 [0.019; 0.054]       | 0.028 [0.016; 0.053]      | 0.381          |
| regulatory         | 0.042 [0.014; 0.051]       | 0.012 [0.009; 0.025]      | 0.110          | 0.024 [0.016; 0.036]       | 0.013 [0.009; 0.042]      | 0.287          |
| CD25+              | 0.008 [0.002; 0.015]       | 0.008 [0.003; 0.018]      | 0.214          | 0.008 [0.006; 0.014]       | 0.009 [0.006; 0.013]      | 0.723          |
| CD4/CD8            | 2.164 [1.772; 4.038]       | 1.558 [1.200; 3.254]      | 0.214          | 2.868 [1.522; 3.885]       | 1.932 [1.343; 3.489]      | 0.266          |
|                    | <b>Infection (n=9)</b>     |                           |                | <b>No infection (n=17)</b> |                           |                |
|                    | <b>Before chemotherapy</b> | <b>After chemotherapy</b> | <b>P value</b> | <b>Before chemotherapy</b> | <b>After chemotherapy</b> | <b>P value</b> |
| <b>NK cells</b>    |                            |                           |                |                            |                           |                |
| NK Cells           | 0.112 [0.078; 0.163]       | 0.126 [0.051; 0.189]      | 0.997          | 0.153 [0.114; 0.297]       | 0.128 [0.073; 0.258]      | 0.237          |
| CD56+CD16+         | 0.041 [0.025; 0.083]       | 0.042 [0.014; 0.064]      | 0.327          | 0.029 [0.015; 0.089]       | 0.043 [0.012; 0.079]      | 0.148          |
| CD56bright CD16dim | 0.003 [0.002; 0.006]       | 0.003 [0.003; 0.005]      | 0.889          | 0.002 [0.000; 0.007]       | 0.002 [0.001; 0.008]      | 0.569          |
| CD56dim CD16bright | 0.005 [0.003; 0.026]       | 0.007 [0.001; 0.013]      | 0.779          | 0.004 [0.002; 0.018]       | 0.006 [0.002; 0.008]      | 0.569          |
| NK/T               | 0.047 [0.035; 0.113]       | 0.055 [0.018; 0.078]      | 0.723          | 0.039 [0.022; 0.098]       | 0.053 [0.019; 0.084]      | 0.134          |

A) Men vs. women B) G-CSF vs. no G-CSF C) Platinum vs. no platinum D) Resmission status E) Radiation vs. no radiation F) Infection vs. no infection  
 Numbers are median values/ml and interquartile ranges in square brackets.  $p < 0.022$  = significant. *n.s.* not significant; *EMRA* effector memory RA+  
*CR* Complete remission, *G-CSF* Granulocyte-colony stimulating factor, *PD* Progressive disease, *PR* Partial remission, *SD* Stable disease
